# Supplementary material for: Digital eye strain syndrome among higher education health sciences students in Saudi Arabia: severity and preventive ergonomic practices
Source: PeerJ journal article supplement (doi:10.7717/peerj.18423), 2024-11-14
Supplement: DES_Questionnaire_English.pdf [file DES_Questionnaire_English.pdf]

**Digital Eye Strain Syndrome Among Higher Education Health Sciences Students in Saudi Arabia: Severity and Preventive Ergonomic Practices.**

|                                                                                  |
|----------------------------------------------------------------------------------|
| <b>Sociodemographic data</b>                                                     |
| <b>1. Age.....</b>                                                               |
| <b>2. Gender</b>                                                                 |
| - Male                                                                           |
| - Female                                                                         |
| <b>3. Residence</b>                                                              |
| - Riyadh                                                                         |
| - Jeddah                                                                         |
| - Dammam                                                                         |
| <b>Medical history</b>                                                           |
| <b>4. Do you have a chronic disease?</b>                                         |
| - Diabetes                                                                       |
| - Hypertension                                                                   |
| - Thyroid gland problems                                                         |
| - Others .....                                                                   |
| <b>5. Do you have an eye problem?</b>                                            |
| - No                                                                             |
| - Yes                                                                            |
| - If yes, mention it.....                                                        |
| <b>6. Do you have a history of eye surgery?</b>                                  |
| - No                                                                             |
| - Yes                                                                            |
| <b>7. Do you wear glasses?</b>                                                   |
| - No                                                                             |
| - Yes                                                                            |
| <b>8. Do you use medication daily?</b>                                           |
| - No                                                                             |
| - Yes                                                                            |
| - If yes, mention it.....                                                        |
| <b>Digital devices use data</b>                                                  |
| <b>9. Duration of digital device use in years.....</b>                           |
| <b>10. Which of the following devices are used more daily?</b>                   |
| - Desktop computer                                                               |
| - Laptop                                                                         |
| - Tablet                                                                         |
| - Smartphone                                                                     |
| <b>11. How many average daily hours are spent in digital device use?.....</b>    |
| <b>12. Do you use protective eyeglasses during digital device use?</b>           |
| - No                                                                             |
| - Yes                                                                            |
| <b>13. Do you use eye lenses during digital device use?</b>                      |
| - No                                                                             |
| - Yes                                                                            |
| <b>14. What is the duration of screen use without a break (in minutes)?.....</b> |

|                                                       |
|-------------------------------------------------------|
| <b>15. What is your preferred method of studying?</b> |
| - Mainly printed paper                                |
| - Mainly digital screen                               |
| - Both are equally used                               |
| <b>16. How many virtual classes hours per week?</b>   |
| - Less than 2 hours                                   |
| - From 2 to 9 hours                                   |
| - 10 or more hours                                    |

### **Digital eye strain syndrome questionnaire**

By choosing the appropriate number, please indicate the extent to which you experience these symptoms (frequency and severity), especially during or after using a digital device for a long period during the past month.

Don't forget: If you choose “Never” in the frequency section, don't select medium or severe in the severity section.

| <b>Symptoms</b>                             | <b>Severity</b>       |                       | <b>Frequency</b>                   |                           |                      |
|---------------------------------------------|-----------------------|-----------------------|------------------------------------|---------------------------|----------------------|
|                                             | <b>Severe<br/>(2)</b> | <b>Medium<br/>(1)</b> | <b>Often or<br/>always<br/>(2)</b> | <b>Occasional<br/>(1)</b> | <b>Never<br/>(0)</b> |
| <b>Vision-related symptoms</b>              |                       |                       |                                    |                           |                      |
| 1. Blurred vision                           |                       |                       |                                    |                           |                      |
| 2. Double vision                            |                       |                       |                                    |                           |                      |
| 3. Difficulty focusing for near vision      |                       |                       |                                    |                           |                      |
| 4. Increased sensitivity to light           |                       |                       |                                    |                           |                      |
| 5. Colored halos around objects             |                       |                       |                                    |                           |                      |
| 6. Feeling that eyesight is worsening       |                       |                       |                                    |                           |                      |
| <b>Eye related symptoms</b>                 |                       |                       |                                    |                           |                      |
| 7. Eye pain                                 |                       |                       |                                    |                           |                      |
| 8. Heavy eyelids                            |                       |                       |                                    |                           |                      |
| 9. Burning                                  |                       |                       |                                    |                           |                      |
| 10. Itching                                 |                       |                       |                                    |                           |                      |
| 11. Redness                                 |                       |                       |                                    |                           |                      |
| 12. Dryness                                 |                       |                       |                                    |                           |                      |
| 13. Tearing                                 |                       |                       |                                    |                           |                      |
| 14. Excessive blinking                      |                       |                       |                                    |                           |                      |
| 15. A feeling of a foreign body in the eyes |                       |                       |                                    |                           |                      |
| 16. Headache                                |                       |                       |                                    |                           |                      |

### Preventive ergonomic practices scale

Choose the appropriate answer for your preventive ergonomic practices against eye strain when using digital screens (computer - tablet - laptop - mobile) by choosing the appropriate number.

|                                                                                                                                                                      | Never | Rarely | Sometimes | Often | Always |
|----------------------------------------------------------------------------------------------------------------------------------------------------------------------|-------|--------|-----------|-------|--------|
| <b>Location of digital screen</b>                                                                                                                                    |       |        |           |       |        |
| 1. Do you place the device screen approximately 15-20 cm below eye level from the center of the screen?                                                              | 1     | 2      | 3         | 4     | 5      |
| 2. Do you place the device screen 45-70 cm from the eye?                                                                                                             | 1     | 2      | 3         | 4     | 5      |
| <b>Display settings</b>                                                                                                                                              |       |        |           |       |        |
| 3. Do you keep your device's screen brightness low?                                                                                                                  | 1     | 2      | 3         | 4     | 5      |
| 4. Do you use dark colors for your screen background?                                                                                                                | 1     | 2      | 3         | 4     | 5      |
| 5. Are you using the appropriate font size on the screen?                                                                                                            | 1     | 2      | 3         | 4     | 5      |
| <b>Lightening</b>                                                                                                                                                    |       |        |           |       |        |
| 6. Are you positioning the screen appropriately to avoid glare or harsh light from lamps or windows?                                                                 | 1     | 2      | 3         | 4     | 5      |
| 7. Do you put curtains on your windows while using a digital screen?                                                                                                 | 1     | 2      | 3         | 4     | 5      |
| 8. Are you using low-wattage light bulbs?                                                                                                                            | 1     | 2      | 3         | 4     | 5      |
| <b>Anti-glare screen or glasses/lenses</b>                                                                                                                           |       |        |           |       |        |
| 9. Do you use a protective screen against screen glare?                                                                                                              | 1     | 2      | 3         | 4     | 5      |
| 10. Do you use glasses or contact lenses while using digital devices?                                                                                                | 1     | 2      | 3         | 4     | 5      |
| <b>Rest breaks</b>                                                                                                                                                   |       |        |           |       |        |
| 11. Do you take a 15-minute break every two hours during digital device use?                                                                                         | 1     | 2      | 3         | 4     | 5      |
| 12. Do you practice the 20-20-20 rule? (Every 20 minutes of screen time, take a 20-second break and focus on something 20 feet away or more than half a meter away.) | 1     | 2      | 3         | 4     | 5      |
| <b>Blinking</b>                                                                                                                                                      |       |        |           |       |        |
| 13. Do you practice frequent blinking while using the digital device?                                                                                                | 1     | 2      | 3         | 4     | 5      |
| <b>Document holder</b>                                                                                                                                               |       |        |           |       |        |
| 14. Do you use a document holder when typing on the device or place the document on the keyboard?                                                                    | 1     | 2      | 3         | 4     | 5      |

| <b>Seating position</b>                                                                              |          |          |          |          |          |  |
|------------------------------------------------------------------------------------------------------|----------|----------|----------|----------|----------|--|
| 15. Do you place your feet in a comfortable position or on the floor while using the digital device? | <b>1</b> | <b>2</b> | <b>3</b> | <b>4</b> | <b>5</b> |  |
| 16. Do you adjust the chair's handles to support the arm and wrist while typing on the keyboard?     | <b>1</b> | <b>2</b> | <b>3</b> | <b>4</b> | <b>5</b> |  |
| 17. Is the chair comfortably padded and conforms to the body?                                        | <b>1</b> | <b>2</b> | <b>3</b> | <b>4</b> | <b>5</b> |  |
