# Supplementary material for: Digital eye strain syndrome among higher education health sciences students in Saudi Arabia: severity and preventive ergonomic practices
Source: PeerJ. 2024 Nov 14;12:e18423. doi: 10.7717/peerj.18423 (PMC11569780; doi:10.7717/peerj.18423)
Supplement: Supplemental Information 4 [file peerj-12-18423-s004.xlsx]

## Sheet: 1
Variable	Position	Measurement Level	Role	Column Width	Alignment	Print Format	Write Format
Age	1	Scale	Input	8	Right	F8.2	F8.2
Sex	2	Nominal	Input	8	Right	F8.2	F8.2
UniversityBranch	3	Nominal	Input	8	Right	F8.2	F8.2
College	4	Nominal	Input	8	Right	F8.2	F8.2
AcademicLevel	5	Nominal	Input	8	Right	F8.2	F8.2
MedicalHistory	6	Nominal	Input	8	Right	F8.2	F8.2
regularmedicationuse	7	Nominal	Input	8	Right	F8.2	F8.2
Eyeproblems	8	Nominal	Input	8	Right	F8.2	F8.2
EyeSurgery	9	Nominal	Input	8	Right	F8.2	F8.2
UseEyeglass	10	Nominal	Input	8	Right	F8.2	F8.2
ScreenUtilizationDurationYear	11	Nominal	Input	8	Right	F8.2	F8.2
TypeofDeviceUse	12	Nominal	Input	8	Right	F8.2	F8.2
ScreenUtilizationDailyHours	13	Nominal	Input	8	Right	F8.2	F8.2
EyeProtection	14	Nominal	Input	8	Right	F8.2	F8.2
Lenses	15	Nominal	Input	8	Right	F8.2	F8.2
ScreenUsewithoutRest	16	Scale	Input	8	Right	F8.2	F8.2
BestWayToStudy	17	Nominal	Input	8	Right	F8.2	F8.2
VirtualLectureHours	18	Nominal	Input	8	Right	F8.2	F8.2
PreviousKnowledgeonDES	19	Nominal	Input	8	Right	F8.2	F8.2
DESdefination	20	Nominal	Input	8	Right	F8.2	F8.2
BlurredVisionSymptome1	21	Nominal	Input	8	Right	F8.2	F8.2
EyeItchingySmptome2	22	Nominal	Input	8	Right	F8.2	F8.2
EyeDrynessSymptome3	23	Nominal	Input	8	Right	F8.2	F8.2
TearfulnessSymptome4	24	Nominal	Input	8	Right	F8.2	F8.2
LightSensetivitySymptome5	25	Nominal	Input	8	Right	F8.2	F8.2
HeadacheySmptome6	26	Nominal	Input	8	Right	F8.2	F8.2
BlinkingSymptome7	27	Nominal	Input	8	Right	F8.2	F8.2
PoorlightCause1	28	Nominal	Input	8	Right	F8.2	F8.2
ScreelightCause2	29	Nominal	Input	8	Right	F8.2	F8.2
LowDistanceCause3	30	Nominal	Input	8	Right	F8.2	F8.2
UncomfertableSettingCause4	31	Nominal	Input	8	Right	F8.2	F8.2
IncreasedBlinkingCause5	32	Nominal	Input	8	Right	F8.2	F8.2
FrequentchangeeyefocusCause6	33	Nominal	Input	8	Right	F8.2	F8.2
Screenbelowprevention1	34	Nominal	Input	8	Right	F8.2	F8.2
ScreenabovePrevention2	35	Nominal	Input	8	Right	F8.2	F8.2
LargeDistancePrevention3	36	Nominal	Input	8	Right	F8.2	F8.2
CurtensWindowPrevention4	37	Nominal	Input	8	Right	F8.2	F8.2
ScreenFrontWindowPrevention5	38	Nominal	Input	8	Right	F8.2	F8.2
LowlighteningPrevention6	39	Nominal	Input	8	Right	F8.2	F8.2
HighLightningPrevention7	40	Nominal	Input	8	Right	F8.2	F8.2
ContanouseblinkingPrevention8	41	Nominal	Input	8	Right	F8.2	F8.2
FrequentrestPrevention9	42	Nominal	Input	8	Right	F8.2	F8.2
ProtectiveScreenPrevention10	43	Nominal	Input	8	Right	F8.2	F8.2
PreventEyeDrynessPrevention11	44	Nominal	Input	8	Right	F8.2	F8.2
BlurredvisionFreyuancy1	45	Nominal	Input	8	Right	F8.2	F8.2
DoublevisionFrequancy2	46	Nominal	Input	8	Right	F8.2	F8.2
DiffecultCocentrationNearFrequancy3	47	Nominal	Input	8	Right	F8.2	F8.2
LightSensetivityFrequancy4	48	Nominal	Input	8	Right	F8.2	F8.2
BlackShadowFrequancy5	49	Nominal	Input	8	Right	F8.2	F8.2
PoorVisionFrequancy6	50	Nominal	Input	8	Right	F8.2	F8.2
EyePainFrequancy1	51	Nominal	Input	8	Right	F8.2	F8.2
HeaveyEyeledFrequancy2	52	Nominal	Input	8	Right	F8.2	F8.2
EyeBurningFrequancy3	53	Nominal	Input	8	Right	F8.2	F8.2
EyeItchingFrequancy4	54	Nominal	Input	8	Right	F8.2	F8.2
EyerednessFrequancy5	55	Nominal	Input	8	Right	F8.2	F8.2
EyeDrynessFreqyancy6	56	Nominal	Input	8	Right	F8.2	F8.2
TearfullnessFrequancy7	57	Nominal	Input	8	Right	F8.2	F8.2
FrequentBlinkingFrequancy8	58	Nominal	Input	8	Right	F8.2	F8.2
ForgenBodyFrequancy9	59	Nominal	Input	8	Right	F8.2	F8.2
HeadacheFrequancy10	60	Nominal	Input	8	Right	F8.2	F8.2
BlurredvisionSeverity1	61	Nominal	Input	8	Right	F8.2	F8.2
DoublevisionSeverity2	62	Nominal	Input	8	Right	F8.2	F8.2
DiffecultCocentrationNearSeverity3	63	Nominal	Input	8	Right	F8.2	F8.2
LightSensetivitySeverity4	64	Nominal	Input	8	Right	F8.2	F8.2
BlackShadowSeverity5	65	Nominal	Input	8	Right	F8.2	F8.2
PoorVisionSeverity6	66	Nominal	Input	8	Right	F8.2	F8.2
EyePainSeverity1	67	Nominal	Input	8	Right	F8.2	F8.2
HeaveyEyeledSeverity2	68	Nominal	Input	8	Right	F8.2	F8.2
EyeBurningSeverity3	69	Nominal	Input	8	Right	F8.2	F8.2
EyeItchingSeverity4	70	Nominal	Input	8	Right	F8.2	F8.2
EyerednessSeverity5	71	Nominal	Input	8	Right	F8.2	F8.2
EyeDrynessSeverity6	72	Nominal	Input	8	Right	F8.2	F8.2
TearfullnessSeverity7	73	Nominal	Input	8	Right	F8.2	F8.2
FrequentBlinkingSeverity8	74	Nominal	Input	8	Right	F8.2	F8.2
ForgenBodySeverity9	75	Nominal	Input	8	Right	F8.2	F8.2
HeadacheSeverity10	76	Nominal	Input	8	Right	F8.2	F8.2
Preventionlocation1	77	Nominal	Input	8	Right	F8.2	F8.2
Preventionlocation2	78	Nominal	Input	8	Right	F8.2	F8.2
Preventionseetings1	79	Nominal	Input	8	Right	F8.2	F8.2
Preventionseetings2	80	Nominal	Input	8	Right	F8.2	F8.2
Preventionseetings3	81	Nominal	Input	8	Right	F8.2	F8.2
Preventionlightning1	82	Nominal	Input	8	Right	F8.2	F8.2
Preventionlightning2	83	Nominal	Input	8	Right	F8.2	F8.2
Preventionlightning3	84	Nominal	Input	8	Right	F8.2	F8.2
PreventionAniglare1	85	Nominal	Input	8	Right	F8.2	F8.2
PreventionAniglare2	86	Nominal	Input	8	Right	F8.2	F8.2
PreventionRest1	87	Nominal	Input	8	Right	F8.2	F8.2
PreventionRest2	88	Nominal	Input	8	Right	F8.2	F8.2
PreventionBlinking1	89	Nominal	Input	8	Right	F8.2	F8.2
PreventionDocummentholder1	90	Nominal	Input	8	Right	F8.2	F8.2
PreventionSeatingPosition1	91	Nominal	Input	8	Right	F8.2	F8.2
PreventionSeatingPosition2	92	Nominal	Input	8	Right	F8.2	F8.2
PreventionSeatingPosition3	93	Nominal	Input	8	Right	F8.2	F8.2
VRclassesCAT	94	Nominal	Input	14	Right	F8.2	F8.2
totalPreventiveBeheviours	95	Scale	Input	27	Right	F8.2	F8.2
TotalPreventionCAT	96	Nominal	Input	20	Right	F8.2	F8.2
BlurredVisionFXS	97	Nominal	Input	18	Right	F8.2	F8.2
DubleVisonFXS	98	Nominal	Input	15	Right	F8.2	F8.2
DifcultConcentrationFXS	99	Nominal	Input	25	Right	F8.2	F8.2
LightSensetivityFXS	100	Nominal	Input	21	Right	F8.2	F8.2
BlacHallowsFXS	101	Nominal	Input	16	Right	F8.2	F8.2
PoorVisionFXS	102	Nominal	Input	15	Right	F8.2	F8.2
EyePainFXS	103	Nominal	Input	12	Right	F8.2	F8.2
HeaveyEyeledFXS	104	Nominal	Input	17	Right	F8.2	F8.2
EyeBurningFXS	105	Nominal	Input	15	Right	F8.2	F8.2
EyeItchingFXS	106	Nominal	Input	15	Right	F8.2	F8.2
EyerednessFXS	107	Nominal	Input	15	Right	F8.2	F8.2
EyeDrynessFXS	108	Nominal	Input	15	Right	F8.2	F8.2
TearfullnessFXS	109	Nominal	Input	17	Right	F8.2	F8.2
FrequentBlinkingFXS	110	Nominal	Input	21	Right	F8.2	F8.2
ForgenBodyFXS	111	Nominal	Input	15	Right	F8.2	F8.2
HeadacheFXS	112	Nominal	Input	13	Right	F8.2	F8.2
BlurredVision	113	Nominal	Input	15	Right	F8.2	F8.2
DoubleVision	114	Nominal	Input	14	Right	F8.2	F8.2
DiffecultCocentration	115	Nominal	Input	23	Right	F8.2	F8.2
LightSensetivity	116	Nominal	Input	18	Right	F8.2	F8.2
BlackHallow	117	Nominal	Input	13	Right	F8.2	F8.2
PoorVision	118	Nominal	Input	12	Right	F8.2	F8.2
EyePain	119	Nominal	Input	10	Right	F8.2	F8.2
HeavyEyeled	120	Nominal	Input	13	Right	F8.2	F8.2
EyeBurning	121	Nominal	Input	12	Right	F8.2	F8.2
EyeItching	122	Nominal	Input	12	Right	F8.2	F8.2
Eyeredness	123	Nominal	Input	12	Right	F8.2	F8.2
EyeDryness	124	Nominal	Input	12	Right	F8.2	F8.2
Tearfullness	125	Nominal	Input	14	Right	F8.2	F8.2
FrequentBlinking	126	Nominal	Input	18	Right	F8.2	F8.2
FrequentBlinkingRecode	127	Nominal	Input	24	Right	F8.2	F8.2
Headache	128	Nominal	Input	10	Right	F8.2	F8.2
TotalDES	129	Scale	Input	10	Right	F8.2	F8.2
DEScat	130	Nominal	Input	10	Right	F8.2	F8.2

## Sheet: 2
Variable Values	Variable Values	Variable Values
Value	Value	Label
Sex	1.00	male
male	2.00	female
UniversityBranch	1.00	Damam
Damam	2.00	Jedah
Jedah	3.00	Ryadeh
Ryadeh	4.00	Elmadinah
College	1.00	health college
MedicalHistory	1.00	free medical history
free medical history	2.00	Diabetus
Diabetus	3.00	Athema
Athema	4.00	hypothyrodism
hypothyrodism	5.00	Anemia
regularmedicationuse	1.00	no
no	2.00	yes
Eyeproblems	1.00	no
no	2.00	Myopia
Myopia	3.00	hyopia
hyopia	4.00	Astigmatism
Astigmatism	5.00	eye drayness
EyeSurgery	1.00	no
no	2.00	yes
UseEyeglass	1.00	no
no	2.00	less than 1 year
less than 1 year	3.00	1 year and more
TypeofDeviceUse	1.00	nemerous devicess
nemerous devicess	2.00	Mobile
Mobile	3.00	Laptop
Laptop	4.00	Tablet
Tablet	5.00	Desktop
EyeProtection	1.00	no
no	2.00	yes
Lenses	1.00	no
no	2.00	yes
BestWayToStudy	1.00	Paper Study
Paper Study	2.00	Screen Utilization
Screen Utilization	3.00	Both
VirtualLectureHours	1.00	Less than 2 hours
Less than 2 hours	2.00	2-9hours
2-9hours	3.00	more than 9 hours
PreviousKnowledgeonDES	1.00	No
No	2.00	yes
DESdefination	.00	False
False	1.00	true
BlurredVisionSymptome1	.00	False
False	1.00	true
EyeItchingySmptome2	.00	False
False	1.00	true
EyeDrynessSymptome3	.00	False
False	1.00	true
TearfulnessSymptome4	.00	False
False	1.00	true
LightSensetivitySymptome5	.00	False
False	1.00	true
HeadacheySmptome6	.00	False
False	1.00	true
BlinkingSymptome7	.00	False
False	1.00	true
PoorlightCause1	.00	False
False	1.00	true
ScreelightCause2	.00	False
False	1.00	true
LowDistanceCause3	.00	False
False	1.00	true
UncomfertableSettingCause4	.00	False
False	1.00	true
IncreasedBlinkingCause5	.00	False
False	1.00	true
FrequentchangeeyefocusCause6	.00	False
False	1.00	true
Screenbelowprevention1	.00	False
False	1.00	true
ScreenabovePrevention2	.00	False
False	1.00	true
LargeDistancePrevention3	.00	False
False	1.00	true
CurtensWindowPrevention4	.00	False
False	1.00	true
ScreenFrontWindowPrevention5	.00	False
False	1.00	true
LowlighteningPrevention6	.00	False
False	1.00	true
HighLightningPrevention7	.00	False
False	1.00	true
ContanouseblinkingPrevention8	.00	False
False	1.00	true
FrequentrestPrevention9	.00	False
False	1.00	true
ProtectiveScreenPrevention10	.00	False
False	1.00	true
PreventEyeDrynessPrevention11	.00	False
False	1.00	true
BlurredvisionFreyuancy1	.00	never
never	1.00	sometimes
sometimes	2.00	Frequently
DoublevisionFrequancy2	.00	never
never	1.00	sometimes
sometimes	2.00	Frequently
DiffecultCocentrationNearFrequancy3	.00	never
never	1.00	sometimes
sometimes	2.00	Frequently
LightSensetivityFrequancy4	.00	never
never	1.00	sometimes
sometimes	2.00	Frequently
BlackShadowFrequancy5	.00	never
never	1.00	sometimes
sometimes	2.00	Frequently
PoorVisionFrequancy6	.00	never
never	1.00	sometimes
sometimes	2.00	Frequently
EyePainFrequancy1	.00	never
never	1.00	sometimes
sometimes	2.00	Frequently
HeaveyEyeledFrequancy2	.00	never
never	1.00	sometimes
sometimes	2.00	Frequently
EyeBurningFrequancy3	.00	never
never	1.00	sometimes
sometimes	2.00	Frequently
EyeItchingFrequancy4	.00	never
never	1.00	sometimes
sometimes	2.00	Frequently
EyerednessFrequancy5	.00	never
never	1.00	sometimes
sometimes	2.00	Frequently
EyeDrynessFreqyancy6	.00	never
never	1.00	sometimes
sometimes	2.00	Frequently
TearfullnessFrequancy7	.00	never
never	1.00	sometimes
sometimes	2.00	Frequently
FrequentBlinkingFrequancy8	.00	never
never	1.00	sometimes
sometimes	2.00	Frequently
ForgenBodyFrequancy9	.00	never
never	1.00	sometimes
sometimes	2.00	Frequently
HeadacheFrequancy10	.00	never
never	1.00	sometimes
sometimes	2.00	Frequently
BlurredvisionSeverity1	.00	never
never	1.00	Moderate
Moderate	2.00	Sever
DoublevisionSeverity2	.00	never
never	1.00	Moderate
Moderate	2.00	Sever
DiffecultCocentrationNearSeverity3	.00	never
never	1.00	Moderate
Moderate	2.00	Sever
LightSensetivitySeverity4	.00	never
never	1.00	Moderate
Moderate	2.00	Sever
BlackShadowSeverity5	.00	never
never	1.00	Moderate
Moderate	2.00	Sever
PoorVisionSeverity6	.00	never
never	1.00	Moderate
Moderate	2.00	Sever
EyePainSeverity1	.00	never
never	1.00	Moderate
Moderate	2.00	Sever
HeaveyEyeledSeverity2	.00	never
never	1.00	Moderate
Moderate	2.00	Sever
EyeBurningSeverity3	.00	never
never	1.00	Moderate
Moderate	2.00	Sever
EyeItchingSeverity4	.00	never
never	1.00	Moderate
Moderate	2.00	Sever
EyerednessSeverity5	.00	never
never	1.00	Moderate
Moderate	2.00	Sever
EyeDrynessSeverity6	.00	never
never	1.00	Moderate
Moderate	2.00	Sever
TearfullnessSeverity7	.00	never
never	1.00	Moderate
Moderate	2.00	Sever
FrequentBlinkingSeverity8	.00	never
never	1.00	Moderate
Moderate	2.00	Sever
ForgenBodySeverity9	.00	never
never	1.00	Moderate
Moderate	2.00	Sever
HeadacheSeverity10	.00	never
never	1.00	Moderate
Moderate	2.00	Sever
Preventionlocation1	1.00	never
never	2.00	Rarly
Rarly	3.00	Sometimes
Sometimes	4.00	mostely
mostely	5.00	alwayes
Preventionlocation2	1.00	never
never	2.00	Rarly
Rarly	3.00	Sometimes
Sometimes	4.00	mostely
mostely	5.00	alwayes
Preventionseetings1	1.00	never
never	2.00	Rarly
Rarly	3.00	Sometimes
Sometimes	4.00	mostely
mostely	5.00	alwayes
Preventionseetings2	1.00	never
never	2.00	Rarly
Rarly	3.00	Sometimes
Sometimes	4.00	mostely
mostely	5.00	alwayes
Preventionseetings3	1.00	never
never	2.00	Rarly
Rarly	3.00	Sometimes
Sometimes	4.00	mostely
mostely	5.00	alwayes
Preventionlightning1	1.00	never
never	2.00	Rarly
Rarly	3.00	Sometimes
Sometimes	4.00	mostely
mostely	5.00	alwayes
Preventionlightning2	1.00	never
never	2.00	Rarly
Rarly	3.00	Sometimes
Sometimes	4.00	mostely
mostely	5.00	alwayes
Preventionlightning3	1.00	never
never	2.00	Rarly
Rarly	3.00	Sometimes
Sometimes	4.00	mostely
mostely	5.00	alwayes
PreventionAniglare1	1.00	never
never	2.00	Rarly
Rarly	3.00	Sometimes
Sometimes	4.00	mostely
mostely	5.00	alwayes
PreventionAniglare2	1.00	never
never	2.00	Rarly
Rarly	3.00	Sometimes
Sometimes	4.00	mostely
mostely	5.00	alwayes
PreventionRest1	1.00	never
never	2.00	Rarly
Rarly	3.00	Sometimes
Sometimes	4.00	mostely
mostely	5.00	alwayes
PreventionRest2	1.00	never
never	2.00	Rarly
Rarly	3.00	Sometimes
Sometimes	4.00	mostely
mostely	5.00	alwayes
PreventionBlinking1	1.00	never
never	2.00	Rarly
Rarly	3.00	Sometimes
Sometimes	4.00	mostely
mostely	5.00	alwayes
PreventionDocummentholder1	1.00	never
never	2.00	Rarly
Rarly	3.00	Sometimes
Sometimes	4.00	mostely
mostely	5.00	alwayes
PreventionSeatingPosition1	1.00	never
never	2.00	Rarly
Rarly	3.00	Sometimes
Sometimes	4.00	mostely
mostely	5.00	alwayes
PreventionSeatingPosition2	1.00	never
never	2.00	Rarly
Rarly	3.00	Sometimes
Sometimes	4.00	mostely
mostely	5.00	alwayes
PreventionSeatingPosition3	1.00	never
never	2.00	Rarly
Rarly	3.00	Sometimes
Sometimes	4.00	mostely
mostely	5.00	alwayes
